# Supplementary material for: At which timescale does the complementary principle perform best in evaporation estimation?
Source: Copernicus journal article supplement (doi:10.5194/hess-25-375-2021), 2021-01-21
Supplement: Supplementary file 1 [file hess-25-375-2021-supplement.pdf]

Supplement of Hydrol. Earth Syst. Sci., 25, 375–386, 2021  
<https://doi.org/10.5194/hess-25-375-2021-supplement>  
© Author(s) 2021. This work is distributed under  
the Creative Commons Attribution 4.0 License.

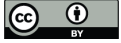

*Supplement of*

## **At which timescale does the complementary principle perform best in evaporation estimation?**

**Liming Wang et al.**

*Correspondence to:* Fuqiang Tian ([tianfq@mail.tsinghua.edu.cn](mailto:tianfq@mail.tsinghua.edu.cn))

The copyright of individual parts of the supplement might differ from the CC BY 4.0 License.

## **Caption**

The information including IGBP (International Geosphere-Biosphere Programme) types, location, study periods, measurement heights, canopy heights and energy balance condition at the 88 eddy flux sites is listed in Table S1. Table S2 provides the evaluation merits (NSE,  $R^2$  and RMSE in  $W\ m^{-2}$ ) of the two generalized complementary functions for each ecosystem types. Table S2 provides the evaluation merits for using the “Bowen ratio” (BR) closure correction method. Figure S1 gives relationship between the estimated evaporation and the observed site mean evaporation at seasonal scale.

**Table S1.** Summary of the information at the 88 eddy flux sites.

| Site name | IGBP | LAT     | LONG    | Year      | Measurement height (m) | Canopy height (m) | Energy balance residual ( $\text{W m}^{-2}$ ) | Energy balance closure ratio |
|-----------|------|---------|---------|-----------|------------------------|-------------------|-----------------------------------------------|------------------------------|
| AT-Neu    | GRA  | 47.117  | 11.318  | 2002~2012 | 2                      | 0.76              | 16.38                                         | 0.83                         |
| AU-ASM    | ENF  | -22.283 | 133.249 | 2010~2014 | 11.7                   | 6.5               | 28.99                                         | 0.82                         |
| AU-Cpr    | SAV  | -34.002 | 140.589 | 2010~2014 | 20                     | 5                 | 17.36                                         | 0.88                         |
| AU-DaS    | SAV  | -14.159 | 131.388 | 2008~2014 | 20.4                   | 16.4              | 25.21                                         | 0.84                         |
| AU-Dry    | SAV  | -15.259 | 132.371 | 2009~2014 | 16.3                   | 12.3              | 31.20                                         | 0.80                         |
| AU-How    | WSA  | -12.494 | 131.152 | 2003~2014 | 23                     | 15                | 17.43                                         | 0.89                         |
| AU-Stp    | GRA  | -17.151 | 133.350 | 2008~2014 | 4.2                    | 0.2               | 5.15                                          | 0.96                         |
| AU-Tum    | EBF  | -35.657 | 148.152 | 2001~2014 | 70                     | 40                | 21.79                                         | 0.88                         |
| AU-Wom    | EBF  | -37.422 | 144.094 | 2010~2014 | 29                     | 25                | 33.10                                         | 0.82                         |
| BE-Bra    | MF   | 51.308  | 4.520   | 1997~2014 | 42                     | 23                | 22.96                                         | 0.82                         |
| BE-Lon    | CRO  | 50.552  | 4.746   | 2004~2014 | 2.7                    | 0.5               | 20.91                                         | 0.80                         |
| BE-Vie    | MF   | 50.305  | 5.998   | 1996~2014 | 40                     | 35.2              | 22.66                                         | 0.83                         |
| BR-Sa1    | EBF  | -2.857  | -54.959 | 2002~2011 | 57.8                   | 41                | 15.52                                         | 0.87                         |
| BR-Sa3    | EBF  | -3.018  | -54.971 | 2000~2004 | 64                     | 27                | 8.05                                          | 0.94                         |
| CA-Gro    | MF   | 48.217  | -82.156 | 2003~2014 | 43.3                   | 30                | 26.28                                         | 0.80                         |
| CA-Man    | ENF  | 55.880  | -98.481 | 1994~2008 | 30                     | 10                | 20.02                                         | 0.85                         |
| CA-NS2    | ENF  | 55.906  | -98.525 | 2001~2005 | 20                     | 16                | 18.55                                         | 0.85                         |
| CA-NS3    | ENF  | 55.912  | -98.382 | 2001~2005 | 10                     | 7                 | 22.53                                         | 0.82                         |

| Site name | IGBP | LAT    | LONG     | Year      | Measurement height (m) | Canopy height (m) | Energy balance residual (W m <sup>-2</sup> ) | Energy balance closure ratio |
|-----------|------|--------|----------|-----------|------------------------|-------------------|----------------------------------------------|------------------------------|
| CA-NS5    | ENF  | 55.863 | -98.485  | 2001~2005 | 9                      | 2                 | 32.79                                        | 0.74                         |
| CA-Oas    | DBF  | 53.629 | -106.198 | 1996~2010 | 39                     | 22                | 15.09                                        | 0.87                         |
| CA-Qfo    | ENF  | 49.693 | -74.342  | 2003~2010 | 24                     | 13.8              | 26.57                                        | 0.80                         |
| CA-SF3    | OSH  | 54.092 | -106.005 | 2001~2006 | 20                     | 1                 | 3.83                                         | 0.96                         |
| CA-TP1    | ENF  | 42.661 | -80.560  | 2002~2014 | 3                      | 2.8               | 24.44                                        | 0.81                         |
| CA-TP3    | ENF  | 42.707 | -80.348  | 2002~2014 | 16                     | 13.1              | 18.51                                        | 0.87                         |
| CA-TP4    | ENF  | 42.710 | -80.357  | 2002~2014 | 28                     | 21.8              | 36.15                                        | 0.78                         |
| CH-Cha    | GRA  | 47.210 | 8.410    | 2006~2012 | 2                      | 0.5               | 1.57                                         | 0.99                         |
| CH-Dav    | ENF  | 46.815 | 9.856    | 1997~2011 | 35                     | 18                | 42.06                                        | 0.70                         |
| CH-Fru    | GRA  | 47.116 | 8.538    | 2006~2012 | 2                      | 0.5               | 7.38                                         | 0.94                         |
| CH-Oe1    | GRA  | 47.286 | 7.732    | 2003~2008 | 1.2                    | 0.5               | 15.12                                        | 0.86                         |
| CZ-BK1    | ENF  | 49.502 | 18.537   | 2004~2014 | 15                     | 9.5               | 22.70                                        | 0.83                         |
| DE-Geb    | CRO  | 51.100 | 10.914   | 2001~2014 | 6                      | 1                 | 7.91                                         | 0.92                         |
| DE-Gri    | GRA  | 50.950 | 13.513   | 2004~2014 | 3                      | 0.5               | 40.78                                        | 0.64                         |
| DE-Hai    | DBF  | 51.079 | 10.453   | 2000~2009 | 43.5                   | 33                | 5.44                                         | 0.95                         |
| DE-Lnf    | DBF  | 51.328 | 10.368   | 2002~2012 | 44                     | 34                | 5.35                                         | 0.95                         |
| DE-Obe    | ENF  | 50.787 | 13.721   | 2008~2014 | 42                     | 13.5              | 23.18                                        | 0.81                         |
| DE-Tha    | ENF  | 50.962 | 13.565   | 1996~2014 | 42                     | 30                | 16.66                                        | 0.87                         |
| DK-Sor    | DBF  | 55.486 | 11.645   | 2003~2013 | 57                     | 25                | -0.15                                        | 1.00                         |
| ES-LJu    | OSH  | 36.927 | -2.752   | 2004~2013 | 2.5                    | 0.5               | 23.42                                        | 0.83                         |
| FI-Hyy    | ENF  | 61.847 | 24.295   | 2005~2014 | 67.2                   | 15                | 9.61                                         | 0.91                         |
| FI-Sod    | ENF  | 67.362 | 26.639   | 2002~2014 | 23                     | 12.7              | -8.71                                        | 1.09                         |

| Site name | IGBP | LAT    | LONG     | Year      | Measurement height (m) | Canopy height (m) | Energy balance residual (W m <sup>-2</sup> ) | Energy balance closure ratio |
|-----------|------|--------|----------|-----------|------------------------|-------------------|----------------------------------------------|------------------------------|
| FR-Fon    | DBF  | 48.476 | 2.780    | 2005~2014 | 35                     | 25                | 10.96                                        | 0.91                         |
| FR-Gri    | CRO  | 48.844 | 1.952    | 2004~2013 | 2.8                    | 2                 | 8.49                                         | 0.92                         |
| FR-LBr    | ENF  | 44.717 | -0.769   | 1996~2008 | 25                     | 18                | 16.20                                        | 0.88                         |
| FR-Pue    | EBF  | 43.741 | 3.596    | 2004~2013 | 11                     | 6                 | 38.20                                        | 0.74                         |
| GF-Guy    | EBF  | 5.279  | -52.925  | 2004~2014 | 52                     | 32                | 6.35                                         | 0.96                         |
| IT-Col    | DBF  | 41.849 | 13.588   | 1996~2014 | 25.2                   | 20.2              | 43.08                                        | 0.73                         |
| IT-Cpz    | EBF  | 41.705 | 12.376   | 1997~2008 | 15                     | 12                | 21.30                                        | 0.87                         |
| IT-Lav    | ENF  | 45.956 | 11.281   | 2004~2014 | 28                     | 28                | 0.72                                         | 1.00                         |
| IT-Noe    | CSH  | 40.606 | 8.151    | 2004~2014 | 2                      | 1.75              | 8.75                                         | 0.95                         |
| IT-Ren    | ENF  | 46.587 | 11.434   | 2002~2013 | 41                     | 31                | -27.06                                       | 1.19                         |
| IT-Ro1    | DBF  | 42.408 | 11.930   | 2001~2008 | 18.6                   | 17                | 24.76                                        | 0.83                         |
| IT-Ro2    | DBF  | 42.390 | 11.921   | 2002~2011 | 18.6                   | 17                | 40.27                                        | 0.75                         |
| IT-SRo    | ENF  | 43.728 | 10.284   | 2000~2007 | 23.5                   | 18                | 44.46                                        | 0.76                         |
| IT-Tor    | GRA  | 45.844 | 7.578    | 2008~2014 | 2.5                    | 0.5               | 2.82                                         | 0.98                         |
| MY-PSO    | EBF  | 2.973  | 102.306  | 2003~2009 | 52                     | 35                | 2.74                                         | 0.98                         |
| NL-Hor    | GRA  | 52.240 | 5.071    | 2004~2011 | 4.3                    | 0.5               | 15.34                                        | 0.87                         |
| NL-Loo    | ENF  | 52.167 | 5.744    | 1997~2014 | 52                     | 15.9              | 26.51                                        | 0.81                         |
| RU-Cok    | OSH  | 70.829 | 147.494  | 2003~2012 | 4.7                    | 0.3               | 17.03                                        | 0.80                         |
| RU-Fyo    | ENF  | 56.462 | 32.922   | 1999~2014 | 42.8                   | 34.8              | 5.79                                         | 0.95                         |
| RU-Sam    | GRA  | 72.374 | 126.496  | 2002~2014 | 4                      | 0.1               | 21.68                                        | 0.77                         |
| US-Atq    | WET  | 70.470 | -157.409 | 2004~2008 | 2.5                    | 0.5               | 10.61                                        | 0.87                         |
| US-Blo    | ENF  | 38.895 | -120.633 | 1997~2007 | 8.5                    | 4                 | 10.35                                        | 0.94                         |

| Site name | IGBP | LAT    | LONG     | Year      | Measurement height (m) | Canopy height (m) | Energy balance residual (W m <sup>-2</sup> ) | Energy balance closure ratio |
|-----------|------|--------|----------|-----------|------------------------|-------------------|----------------------------------------------|------------------------------|
| US-Cop    | GRA  | 38.090 | -109.390 | 2001~2007 | 1.85                   | 0.1               | 33.39                                        | 0.71                         |
| US-GBT    | ENF  | 41.366 | -106.240 | 2001~2005 | 29                     | 1                 | 19.72                                        | 0.86                         |
| US-GLE    | ENF  | 41.367 | -106.240 | 2005~2014 | 22.65                  | 18                | 21.21                                        | 0.85                         |
| US-Goo    | GRA  | 34.255 | -89.874  | 2002~2006 | 4                      | 0.3               | 25.45                                        | 0.81                         |
| US-Ha1    | DBF  | 42.538 | -72.172  | 1992~2012 | 30                     | 26                | 16.84                                        | 0.87                         |
| US-IB2    | GRA  | 41.841 | -88.241  | 2005~2011 | 3.76                   | 0.5               | 31.23                                        | 0.77                         |
| US-Los    | WET  | 46.083 | -89.979  | 2000~2010 | 10.2                   | 2                 | 29.20                                        | 0.76                         |
| US-Me2    | ENF  | 44.452 | -121.557 | 2002~2014 | 32                     | 16                | 13.14                                        | 0.92                         |
| US-Me3    | ENF  | 44.315 | -121.608 | 2004~2009 | 12                     | 3.1               | 23.60                                        | 0.83                         |
| US-MMS    | DBF  | 39.323 | -86.413  | 2000~2014 | 46                     | 27                | 35.60                                        | 0.76                         |
| US-Ne1    | CRO  | 41.165 | -96.477  | 2002~2013 | 6.2                    | 2                 | 26.98                                        | 0.81                         |
| US-Ne2    | CRO  | 41.165 | -96.470  | 2001~2013 | 6.2                    | 2                 | 22.19                                        | 0.84                         |
| US-Ne3    | CRO  | 41.180 | -96.440  | 2001~2013 | 6.2                    | 2                 | 16.36                                        | 0.88                         |
| US-NR1    | ENF  | 40.033 | -105.546 | 1999~2014 | 21.5                   | 11.4              | 26.46                                        | 0.83                         |
| US-SRC    | MF   | 31.908 | -110.840 | 2008~2014 | 4.25                   | 1.7               | 22.01                                        | 0.82                         |
| US-SRG    | GRA  | 31.789 | -110.828 | 2008~2014 | 8                      | 2.5               | 13.18                                        | 0.89                         |
| US-SRM    | WSA  | 31.821 | -110.866 | 2004~2014 | 6.4                    | 2.5               | 17.72                                        | 0.87                         |
| US-Syv    | MF   | 46.242 | -89.348  | 2002~2008 | 36                     | 27                | 15.20                                        | 0.87                         |
| US-Ton    | WSA  | 38.432 | -120.966 | 2001~2014 | 23                     | 9.41              | 29.51                                        | 0.81                         |
| US-UMB    | DBF  | 45.560 | -84.714  | 2000~2014 | 46                     | 22                | 8.22                                         | 0.94                         |
| US-UMd    | DBF  | 45.563 | -84.698  | 2007~2014 | 34                     | 22                | 10.36                                        | 0.92                         |

| Site name | IGBP | LAT     | LONG     | Year      | Measurement height (m) | Canopy height (m) | Energy balance residual (W m <sup>-2</sup> ) | Energy balance closure ratio |
|-----------|------|---------|----------|-----------|------------------------|-------------------|----------------------------------------------|------------------------------|
| US-Var    | GRA  | 38.413  | -120.951 | 2001~2014 | 2                      | 0.3               | 13.09                                        | 0.89                         |
| US-WCr    | DBF  | 45.806  | -90.080  | 1999~2014 | 29.6                   | 24                | 22.80                                        | 0.82                         |
| US-Whs    | OSH  | 31.744  | -110.052 | 2007~2014 | 6                      | 1                 | 16.83                                        | 0.87                         |
| US-Wkg    | GRA  | 31.737  | -109.942 | 2004~2014 | 6.4                    | 0.5               | 12.78                                        | 0.89                         |
| ZA-Kru    | SAV  | -25.020 | 31.497   | 2000~2013 | 16                     | 10                | 4.06                                         | 0.97                         |

**Table S2.** The NSE values of the SGC ( $NSE_H$ ) and PGC functions ( $NSE_B$ ) for each site at different time scales. The subscript H and B correspond to the sigmoid function proposed in Han & Tian (2018) and the polynomial function proposed in Brutsaert (2015), respectively.

| Site name | $NSE_H$ |      |       |       | $NSE_B$ |      |       |       |
|-----------|---------|------|-------|-------|---------|------|-------|-------|
|           | Day     | Week | Month | Year  | Day     | Week | Month | Year  |
| AT-Neu    | 0.88    | 0.90 | 0.87  | -1.18 | 0.89    | 0.91 | 0.94  | 0.92  |
| AU-ASM    | 0.63    | 0.67 | 0.75  | 0.72  | 0.64    | 0.68 | 0.76  | 0.74  |
| AU-Cpr    | -0.26   | 0.45 | 0.60  | 0.47  | -0.75   | 0.43 | 0.59  | 0.54  |
| AU-DaS    | 0.78    | 0.83 | 0.87  | 0.81  | 0.76    | 0.82 | 0.87  | 0.80  |
| AU-Dry    | 0.84    | 0.88 | 0.90  | 0.90  | 0.83    | 0.88 | 0.90  | 0.91  |
| AU-How    | 0.67    | 0.65 | 0.56  | 0.33  | 0.65    | 0.64 | 0.57  | 0.38  |
| AU-Stp    | 0.80    | 0.85 | 0.95  | 0.84  | 0.82    | 0.78 | 0.90  | 0.60  |
| AU-Tum    | 0.71    | 0.87 | 0.85  | 0.81  | 0.68    | 0.86 | 0.85  | 0.84  |
| AU-Wom    | -0.37   | 0.53 | 0.48  | -0.48 | -0.32   | 0.31 | 0.42  | 0.28  |
| BE-Bra    | 0.46    | 0.48 | 0.64  | 0.36  | 0.43    | 0.46 | 0.64  | 0.47  |
| BE-Lon    | 0.61    | 0.52 | 0.48  | -0.68 | 0.52    | 0.34 | 0.28  | -0.52 |
| BE-Vie    | 0.34    | 0.54 | 0.59  | 0.51  | 0.32    | 0.50 | 0.51  | 0.45  |
| BR-Sa1    | 0.93    | 0.97 | 0.95  | 0.82  | 0.89    | 0.94 | 0.89  | 0.71  |
| BR-Sa3    | 0.85    | 0.92 | 0.89  | 0.80  | 0.81    | 0.90 | 0.86  | 0.75  |
| CA-Gro    | 0.30    | 0.71 | 0.80  | 0.86  | 0.36    | 0.68 | 0.77  | 0.88  |
| CA-Man    | -0.44   | 0.46 | 0.34  | 0.53  | -0.61   | 0.45 | 0.31  | 0.51  |
| CA-NS2    | 0.29    | 0.44 | 0.37  | -0.19 | 0.18    | 0.39 | 0.33  | -0.24 |
| CA-NS3    | 0.26    | 0.49 | 0.42  | -1.22 | 0.13    | 0.32 | 0.21  | -2.90 |
| CA-NS5    | 0.51    | 0.76 | 0.86  | -0.57 | 0.28    | 0.67 | 0.86  | -0.65 |
| CA-Oas    | 0.66    | 0.70 | 0.68  | 0.47  | 0.65    | 0.74 | 0.74  | 0.68  |
| CA-Qfo    | -0.60   | 0.28 | 0.27  | 0.42  | -0.68   | 0.25 | 0.19  | 0.52  |
| CA-SF3    | 0.79    | 0.85 | 0.74  | 0.72  | 0.68    | 0.78 | 0.59  | 0.64  |
| CA-TP1    | 0.20    | 0.30 | 0.36  | 0.66  | 0.16    | 0.27 | 0.31  | 0.65  |
| CA-TP3    | -0.03   | 0.12 | 0.03  | -1.62 | -0.08   | 0.07 | -0.01 | -1.74 |
| CA-TP4    | 0.14    | 0.18 | 0.27  | -0.34 | 0.08    | 0.13 | 0.23  | -0.26 |
| CH-Cha    | 0.89    | 0.86 | 0.84  | 0.47  | 0.88    | 0.86 | 0.90  | 0.95  |
| CH-Dav    | 0.35    | 0.48 | 0.68  | 0.31  | 0.06    | 0.20 | 0.59  | 0.90  |
| CH-Fru    | 0.92    | 0.88 | 0.77  | -0.42 | 0.90    | 0.87 | 0.88  | 0.88  |
| CH-Oe1    | 0.84    | 0.78 | 0.66  | -2.29 | 0.79    | 0.72 | 0.72  | -0.43 |
| CZ-BK1    | 0.04    | 0.20 | 0.48  | 0.31  | -0.15   | 0.09 | 0.44  | 0.29  |
| DE-Geb    | 0.58    | 0.61 | 0.72  | 0.32  | 0.54    | 0.58 | 0.73  | 0.30  |
| DE-Gri    | 0.89    | 0.87 | 0.88  | 0.21  | 0.88    | 0.85 | 0.83  | 0.70  |
| DE-Hai    | 0.54    | 0.61 | 0.62  | 0.54  | 0.48    | 0.57 | 0.58  | 0.63  |
| DE-Lnf    | 0.62    | 0.75 | 0.75  | -1.19 | 0.57    | 0.71 | 0.71  | -0.49 |



|        |       |       |       |       |       |       |       |       |
|--------|-------|-------|-------|-------|-------|-------|-------|-------|
| DE-Obe | 0.59  | 0.46  | 0.68  | 0.55  | 0.55  | 0.35  | 0.66  | 0.50  |
| DE-Tha | -0.05 | 0.44  | 0.48  | 0.51  | 0.03  | 0.34  | 0.40  | 0.44  |
| DK-Sor | 0.48  | 0.58  | 0.66  | 0.08  | 0.47  | 0.59  | 0.67  | 0.45  |
| ES-LJu | -0.53 | 0.04  | 0.12  | -0.66 | -0.95 | -0.24 | -0.28 | -1.41 |
| FI-Hyy | 0.21  | -0.01 | 0.69  | 0.79  | 0.05  | -0.40 | 0.68  | 0.79  |
| FI-Sod | 0.35  | 0.61  | 0.26  | 0.21  | 0.27  | 0.61  | 0.26  | 0.22  |
| FR-Fon | 0.73  | 0.80  | 0.84  | 0.65  | 0.70  | 0.81  | 0.84  | 0.04  |
| FR-Gri | 0.59  | 0.53  | 0.51  | 0.58  | 0.53  | 0.50  | 0.44  | 0.60  |
| FR-LBr | -0.03 | 0.36  | 0.45  | 0.63  | 0.04  | 0.32  | 0.41  | 0.68  |
| FR-Pue | -0.23 | 0.44  | 0.56  | 0.14  | -0.21 | 0.43  | 0.56  | 0.03  |
| GF-Guy | 0.53  | 0.04  | -1.27 | 0.41  | 0.44  | -0.04 | -1.45 | -0.04 |
| IT-Col | 0.49  | 0.81  | 0.88  | 0.80  | 0.40  | 0.79  | 0.88  | 0.81  |
| IT-Cpz | -0.86 | -0.89 | -1.15 | -5.55 | -0.96 | -0.95 | -1.20 | -5.50 |
| IT-Lav | -2.94 | -4.97 | -1.10 | -6.57 | -4.45 | -7.48 | -1.26 | -7.25 |
| IT-Noe | -2.08 | -0.72 | -0.31 | 0.11  | -3.68 | -1.21 | -0.54 | 0.12  |
| IT-Ren | -0.99 | 0.29  | 0.53  | 0.54  | -2.35 | 0.09  | 0.43  | 0.43  |
| IT-Ro1 | 0.32  | 0.47  | 0.57  | 0.19  | 0.26  | 0.46  | 0.57  | 0.32  |
| IT-Ro2 | 0.59  | 0.65  | 0.71  | 0.77  | 0.56  | 0.66  | 0.73  | 0.81  |
| IT-SRo | -0.56 | -0.63 | -0.31 | 0.50  | -0.87 | -0.85 | -0.48 | 0.47  |
| IT-Tor | 0.84  | 0.86  | 0.92  | 0.75  | 0.74  | 0.75  | 0.88  | 0.52  |
| MY-PSO | -0.76 | -1.64 | -2.47 | 0.34  | -1.19 | -2.17 | -3.04 | 0.13  |
| NL-Hor | 0.90  | 0.86  | 0.85  | -0.78 | 0.90  | 0.90  | 0.92  | 0.80  |
| NL-Loo | 0.08  | 0.17  | 0.26  | 0.70  | -0.33 | -0.25 | -0.07 | 0.64  |
| RU-Cok | 0.69  | 0.75  | 0.84  | 0.69  | 0.51  | 0.64  | 0.82  | 0.74  |
| RU-Fyo | 0.37  | 0.67  | 0.72  | 0.76  | 0.36  | 0.66  | 0.70  | 0.77  |
| RU-Sam | 0.82  | 0.84  | 0.82  | 0.89  | 0.66  | 0.80  | 0.74  | 0.77  |
| US-Atq | 0.65  | -0.82 | 0.91  | 0.78  | 0.44  | -2.64 | 0.92  | 0.78  |
| US-Blo | 0.50  | 0.68  | 0.76  | 0.22  | 0.46  | 0.67  | 0.75  | 0.23  |
| US-Cop | -0.31 | -0.19 | -0.76 | -0.21 | -0.78 | -0.58 | -1.21 | -0.71 |
| US-GBT | -0.60 | -1.04 | 0.83  | 0.36  | -1.37 | -2.44 | 0.81  | 0.40  |
| US-GLE | -0.09 | 0.60  | 0.68  | 0.56  | -0.01 | 0.52  | 0.63  | 0.62  |
| US-Goo | 0.81  | 0.73  | 0.61  | 0.51  | 0.76  | 0.67  | 0.40  | 0.47  |
| US-Ha1 | 0.76  | 0.80  | 0.84  | 0.91  | 0.75  | 0.84  | 0.88  | 0.92  |
| US-IB2 | 0.84  | 0.84  | 0.85  | -0.92 | 0.79  | 0.78  | 0.82  | -0.21 |
| US-Los | 0.83  | 0.87  | 0.88  | 0.68  | 0.79  | 0.84  | 0.87  | 0.66  |
| US-Me2 | -0.37 | 0.72  | 0.78  | 0.36  | -0.75 | 0.72  | 0.78  | 0.39  |
| US-Me3 | 0.00  | 0.75  | 0.80  | 0.74  | -0.60 | 0.74  | 0.81  | 0.79  |
| US-MMS | 0.80  | 0.90  | 0.91  | 0.34  | 0.79  | 0.90  | 0.93  | 0.45  |
| US-Ne1 | 0.82  | 0.87  | 0.89  | 0.90  | 0.81  | 0.88  | 0.92  | 0.84  |
| US-Ne2 | 0.80  | 0.86  | 0.85  | 0.85  | 0.79  | 0.85  | 0.86  | 0.80  |
| US-Ne3 | 0.79  | 0.88  | 0.89  | 0.95  | 0.77  | 0.87  | 0.90  | 0.95  |
| US-NR1 | 0.01  | -0.81 | 0.72  | 0.67  | -0.04 | -1.23 | 0.70  | 0.70  |
| US-SRC | 0.66  | 0.75  | 0.76  | 0.78  | 0.63  | 0.74  | 0.76  | 0.78  |
| US-SRG | 0.65  | 0.73  | 0.75  | 0.62  | 0.66  | 0.74  | 0.76  | 0.61  |

|        |      |      |      |      |      |      |      |       |
|--------|------|------|------|------|------|------|------|-------|
| US-SRM | 0.61 | 0.72 | 0.76 | 0.66 | 0.60 | 0.72 | 0.77 | 0.66  |
| US-Syv | 0.74 | 0.81 | 0.81 | 0.12 | 0.64 | 0.74 | 0.70 | 0.48  |
| US-Ton | 0.30 | 0.37 | 0.35 | 0.08 | 0.28 | 0.37 | 0.36 | 0.06  |
| US-UMB | 0.41 | 0.72 | 0.76 | 0.71 | 0.41 | 0.72 | 0.76 | 0.70  |
| US-UMd | 0.64 | 0.74 | 0.71 | 0.81 | 0.62 | 0.74 | 0.70 | 0.81  |
| US-Var | 0.49 | 0.63 | 0.73 | 0.83 | 0.16 | 0.37 | 0.41 | 0.74  |
| US-WCr | 0.79 | 0.84 | 0.87 | 0.70 | 0.76 | 0.85 | 0.86 | 0.54  |
| US-Whs | 0.74 | 0.84 | 0.88 | 0.14 | 0.72 | 0.84 | 0.90 | -0.02 |
| US-Wkg | 0.73 | 0.82 | 0.86 | 0.77 | 0.71 | 0.83 | 0.88 | 0.80  |
| ZA-Kru | 0.77 | 0.83 | 0.87 | 0.89 | 0.77 | 0.83 | 0.88 | 0.89  |

**Table S3.** The evaluation merits (NSE,  $R^2$  and RMSE in  $W m^{-2}$ ) of the two generalized complementary functions for each ecosystem types. The subscript H and B correspond to the sigmoid function proposed in Han & Tian (2018) and the polynomial function proposed in Brutsaert (2015), respectively. The suffixes “\_d”, “\_w”, “\_m”, “\_y” represents the results at the daily, weekly, monthly and yearly, respectively.

|       | NSE <sub>H</sub> | $R^2_H$ | RMSE <sub>H</sub> | NSE <sub>B</sub> | $R^2_B$ | RMSE <sub>B</sub> |
|-------|------------------|---------|-------------------|------------------|---------|-------------------|
| CRO_d | 0.70             | 0.72    | 22.16             | 0.66             | 0.72    | 23.26             |
| CRO_w | 0.71             | 0.74    | 17.26             | 0.67             | 0.75    | 18.09             |
| CRO_m | 0.72             | 0.75    | 14.45             | 0.69             | 0.77    | 14.47             |
| CRO_y | 0.49             | 0.61    | 5.05              | 0.50             | 0.62    | 5.33              |
| CSH_d | -2.08            | 0.00    | 46.67             | -3.68            | 0.00    | 61.72             |
| CSH_w | -0.72            | 0.05    | 29.26             | -1.21            | 0.03    | 34.22             |
| CSH_m | -0.31            | 0.10    | 22.52             | -0.54            | 0.11    | 24.48             |
| CSH_y | 0.11             | 0.17    | 17.28             | 0.12             | 0.21    | 17.12             |
| DBF_d | 0.60             | 0.65    | 24.60             | 0.57             | 0.63    | 25.46             |
| DBF_w | 0.72             | 0.73    | 18.05             | 0.72             | 0.74    | 17.92             |
| DBF_m | 0.75             | 0.77    | 14.84             | 0.76             | 0.78    | 14.52             |
| DBF_y | 0.44             | 0.62    | 6.56              | 0.51             | 0.66    | 6.24              |
| EBF_d | 0.10             | 0.58    | 24.13             | 0.02             | 0.56    | 25.18             |
| EBF_w | 0.15             | 0.64    | 14.95             | 0.03             | 0.62    | 16.08             |
| EBF_m | -0.15            | 0.62    | 12.36             | -0.26            | 0.61    | 12.93             |
| EBF_y | -0.34            | 0.53    | 7.97              | -0.35            | 0.54    | 7.89              |
| ENF_d | -0.08            | 0.50    | 31.24             | -0.33            | 0.49    | 34.59             |
| ENF_w | 0.10             | 0.64    | 21.44             | -0.15            | 0.63    | 23.68             |
| ENF_m | 0.45             | 0.71    | 14.37             | 0.39             | 0.71    | 15.07             |

|       |      |      |       |       |      |       |
|-------|------|------|-------|-------|------|-------|
| ENF_y | 0.02 | 0.53 | 7.94  | -0.05 | 0.54 | 7.86  |
| GRA_d | 0.73 | 0.81 | 16.36 | 0.65  | 0.80 | 18.65 |
| GRA_w | 0.75 | 0.82 | 13.29 | 0.68  | 0.82 | 15.08 |
| GRA_m | 0.75 | 0.84 | 10.90 | 0.68  | 0.84 | 11.88 |
| GRA_y | 0.01 | 0.75 | 7.58  | 0.49  | 0.77 | 5.78  |
| MF_d  | 0.50 | 0.64 | 21.78 | 0.48  | 0.63 | 22.45 |
| MF_w  | 0.66 | 0.71 | 14.51 | 0.62  | 0.72 | 15.37 |
| MF_m  | 0.72 | 0.75 | 11.42 | 0.68  | 0.77 | 12.32 |
| MF_y  | 0.53 | 0.57 | 6.90  | 0.61  | 0.65 | 6.59  |
| OSH_d | 0.42 | 0.65 | 21.23 | 0.24  | 0.64 | 25.07 |
| OSH_w | 0.62 | 0.74 | 13.82 | 0.51  | 0.72 | 15.64 |
| OSH_m | 0.64 | 0.79 | 10.37 | 0.51  | 0.79 | 11.67 |
| OSH_y | 0.22 | 0.66 | 6.32  | -0.01 | 0.67 | 6.94  |
| SAV_d | 0.53 | 0.69 | 20.44 | 0.40  | 0.67 | 22.23 |
| SAV_w | 0.75 | 0.76 | 14.06 | 0.74  | 0.77 | 14.14 |
| SAV_m | 0.81 | 0.83 | 10.61 | 0.81  | 0.83 | 10.48 |
| SAV_y | 0.77 | 0.82 | 6.50  | 0.79  | 0.82 | 6.34  |
| WET_d | 0.74 | 0.83 | 16.24 | 0.62  | 0.80 | 19.52 |
| WET_w | 0.03 | 0.89 | 22.55 | -0.90 | 0.87 | 30.24 |
| WET_m | 0.89 | 0.92 | 7.77  | 0.90  | 0.93 | 7.59  |
| WET_y | 0.73 | 0.84 | 4.71  | 0.72  | 0.86 | 4.75  |
| WSA_d | 0.53 | 0.56 | 24.08 | 0.51  | 0.55 | 24.52 |
| WSA_w | 0.56 | 0.59 | 20.25 | 0.57  | 0.59 | 20.29 |
| WSA_m | 0.56 | 0.59 | 17.55 | 0.57  | 0.60 | 17.33 |
| WSA_y | 0.36 | 0.47 | 8.29  | 0.37  | 0.47 | 8.22  |

**Table S4.** The evaluation merits (NSE,  $R^2$  and RMSE in  $W m^{-2}$ ) of the two generalized complementary functions using the “Bowen ratio” (BR) closure correction method. The subscript H and B correspond to the SGC function proposed in Han & Tian (2018) and the PGC function proposed in Brutsaert (2015), respectively.

|                    | Day   | Week | Month | Season | Year  |
|--------------------|-------|------|-------|--------|-------|
| NSE <sub>H</sub>   | 0.01  | 0.23 | 0.4   | 0.17   | -0.07 |
| NSE <sub>B</sub>   | -0.28 | 0.03 | 0.27  | 0.11   | -0.23 |
| $R^2$ <sub>H</sub> | 0.53  | 0.62 | 0.67  | 0.54   | 0.52  |
| $R^2$ <sub>B</sub> | 0.52  | 0.61 | 0.68  | 0.55   | 0.52  |
| RMSE <sub>H</sub>  | 26.62 | 18.9 | 14.56 | 11.3   | 7.88  |

|          |       |       |       |      |      |
|----------|-------|-------|-------|------|------|
| $RMSE_B$ | 29.77 | 20.59 | 15.26 | 11.3 | 8.03 |
|----------|-------|-------|-------|------|------|

---

**Figure S1.** The estimated evaporation vs the observed site mean evaporation at seasonal scale based on the sigmoid function (a) and the polynomial function (b). Each dot represents the site mean result ( $N = 88$  in each panel). The regression equations and determination coefficients ( $R^2$ ) were calculated by the site mean results of the 88 EC sites. The subscript H and B correspond to the sigmoid function proposed in Han & Tian (2018) and the polynomial function proposed in Brutsaert (2015), respectively.

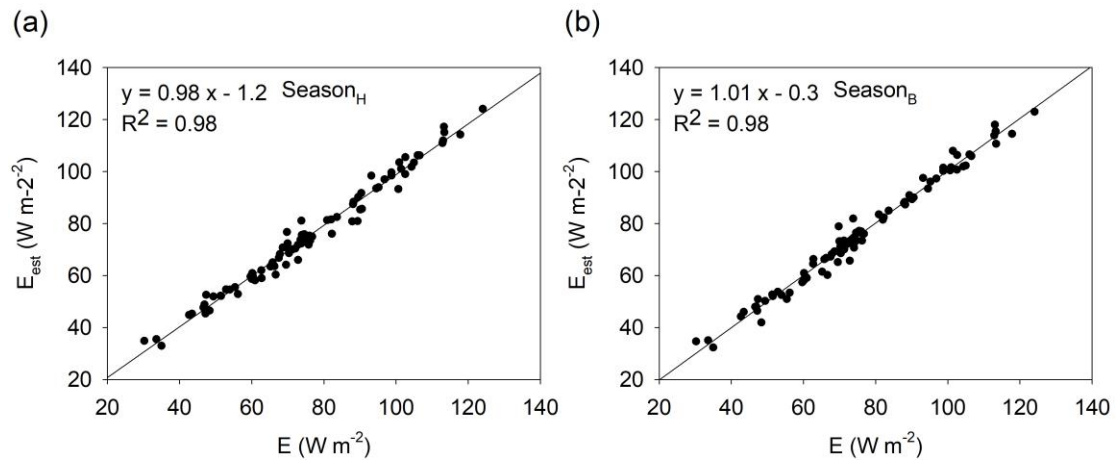

## Reference list for dataset

| Site name | DOI                  | Creator          | Title                                                                                       | Date of last access |
|-----------|----------------------|------------------|---------------------------------------------------------------------------------------------|---------------------|
| AT-Neu    | 10.18140/FLX/1440121 | Georg Wohlfahrt  | FLUXNET2015 AT-Neu Neustift                                                                 | 2020.2.15           |
| AU-ASM    | 10.18140/FLX/1440194 | James Cleverly   | FLUXNET2015 AU-ASM Alice Springs                                                            | 2020.2.15           |
| AU-Cpr    | 10.18140/FLX/1440195 | Wayne Meyer      | FLUXNET2015 AU-Cpr Calperum                                                                 | 2020.2.15           |
| AU-DaS    | 10.18140/FLX/1440122 | Jason Beringer   | FLUXNET2015 AU-DaS Daly River Cleared                                                       | 2020.2.15           |
| AU-Dry    | 10.18140/FLX/1440197 | Jason Beringer   | FLUXNET2015 AU-Dry Dry River                                                                | 2020.2.15           |
| AU-How    | 10.18140/FLX/1440125 | Jason Beringer   | FLUXNET2015 AU-How Howard Springs                                                           | 2020.2.15           |
| AU-Stp    | 10.18140/FLX/1440204 | Jason Beringer   | FLUXNET2015 AU-Stp Sturt Plains                                                             | 2020.2.15           |
| AU-Tum    | 10.18140/FLX/1440126 | William Woodgate | FLUXNET2015 AU-Tum Tumbarumba                                                               | 2020.2.15           |
| AU-Wom    | 10.18140/FLX/1440207 | Stefan Arndt     | FLUXNET2015 AU-Wom Wombat                                                                   | 2020.2.15           |
| BE-Bra    | 10.18140/FLX/1440128 | Ivan Janssens    | FLUXNET2015 BE-Bra Brasschaat                                                               | 2020.2.15           |
| BE-Lon    | 10.18140/FLX/1440129 | Anne De Ligne    | FLUXNET2015 BE-Lon Lonzee                                                                   | 2020.2.15           |
| BE-Vie    | 10.18140/FLX/1440130 | Anne De Ligne    | FLUXNET2015 BE-Vie Vielsalm                                                                 | 2020.2.15           |
| BR-Sa1    | 10.18140/FLX/1440032 | Scott Saleska    | FLUXNET2015 BR-Sa1 Santarem-Km67-Primary Forest                                             | 2020.2.15           |
| BR-Sa3    | 10.18140/FLX/1440033 | Mike Goulden     | FLUXNET2015 BR-Sa3 Santarem-Km83-Logged Forest                                              | 2020.2.15           |
| CA-Gro    | 10.18140/FLX/1440034 | Harry McCaughey  | FLUXNET2015 CA-Gro Ontario - Groundhog River, Boreal Mixedwood Forest                       | 2020.2.15           |
| CA-Man    | 10.18140/FLX/1440035 | Brian Amiro      | FLUXNET2015 CA-Man Manitoba - Northern Old Black Spruce (former BOREAS Northern Study Area) | 2020.2.15           |
| CA-NS2    | 10.18140/FLX/1440037 | Mike Goulden     | FLUXNET2015 CA-NS2 UCI-1930 burn site                                                       | 2020.2.15           |
| CA-NS3    | 10.18140/FLX/1440038 | Mike Goulden     | FLUXNET2015 CA-NS3 UCI-1964 burn site                                                       | 2020.2.15           |
| CA-NS5    | 10.18140/FLX/1440040 | Mike Goulden     | FLUXNET2015 CA-NS5 UCI-1981 burn site                                                       | 2020.2.15           |

| Site name | DOI                  | Creator             | Title                                                                   | Date of last access |
|-----------|----------------------|---------------------|-------------------------------------------------------------------------|---------------------|
| CA-Oas    | 10.18140/FLX/1440043 | T. Andrew Black     | FLUXNET2015 CA-Oas Saskatchewan - Western Boreal, Mature Aspen          | 2020.2.15           |
| CA-Qfo    | 10.18140/FLX/1440045 | Hank A. Margolis    | FLUXNET2015 CA-Qfo Quebec - Eastern Boreal, Mature Black Spruce         | 2020.2.15           |
| CA-SF3    | 10.18140/FLX/1440048 | Brian Amiro         | FLUXNET2015 CA-SF3 Saskatchewan - Western Boreal, forest burned in 1998 | 2020.2.15           |
| CA-TP1    | 10.18140/FLX/1440050 | M. Altaf Arain      | FLUXNET2015 CA-TP1 Ontario - Turkey Point 2002 Plantation White Pine    | 2020.2.15           |
| CA-TP3    | 10.18140/FLX/1440052 | M. Altaf Arain      | FLUXNET2015 CA-TP3 Ontario - Turkey Point 1974 Plantation White Pine    | 2020.2.15           |
| CA-TP4    | 10.18140/FLX/1440053 | M. Altaf Arain      | FLUXNET2015 CA-TP4 Ontario - Turkey Point 1939 Plantation White Pine    | 2020.2.15           |
| CH-Cha    | 10.18140/FLX/1440131 | Lukas Hörtnagl      | FLUXNET2015 CH-Cha Chamau                                               | 2020.2.15           |
| CH-Dav    | 10.18140/FLX/1440132 | Lukas Hörtnagl      | FLUXNET2015 CH-Dav Davos                                                | 2020.2.15           |
| CH-Fru    | 10.18140/FLX/1440133 | Lukas Hörtnagl      | FLUXNET2015 CH-Fru Frübüel                                              | 2020.2.15           |
| CH-Oe1    | 10.18140/FLX/1440135 | Christoph Ammann    | FLUXNET2015 CH-Oe1 Oensingen grassland                                  | 2020.2.15           |
| CZ-BK1    | 10.18140/FLX/1440143 | Ladislav Sigut      | FLUXNET2015 CZ-BK1 Bily Kriz forest                                     | 2020.2.15           |
| DE-Geb    | 10.18140/FLX/1440146 | Christian Brümmer   | FLUXNET2015 DE-Geb Gebesee                                              | 2020.2.15           |
| DE-Gri    | 10.18140/FLX/1440147 | Christian Bernhofer | FLUXNET2015 DE-Gri Grillenburg                                          | 2020.2.15           |
| DE-Hai    | 10.18140/FLX/1440148 | Alexander Knohl     | FLUXNET2015 DE-Hai Hainich                                              | 2020.2.15           |
| DE-Lnf    | 10.18140/FLX/1440150 | Alexander Knohl     | FLUXNET2015 DE-Lnf Leinefelde                                           | 2020.2.15           |
| DE-Obe    | 10.18140/FLX/1440151 | Christian Bernhofer | FLUXNET2015 DE-Obe Oberbärenburg                                        | 2020.2.15           |
| DE-Tha    | 10.18140/FLX/1440152 | Christian Bernhofer | FLUXNET2015 DE-Tha Tharandt                                             | 2020.2.15           |
| DK-Sor    | 10.18140/FLX/1440155 | Andreas Ibrom       | FLUXNET2015 DK-Sor Soroe                                                | 2020.2.15           |

| Site name | DOI                  | Creator                        | Title                                           | Date of last access |
|-----------|----------------------|--------------------------------|-------------------------------------------------|---------------------|
| ES-LJu    | 10.18140/FLX/1440157 | Erique Pérez Sánchez<br>Cañete | FLUXNET2015 ES-LJu Llano de los Juanes          | 2020.2.15           |
| FI-Hyy    | 10.18140/FLX/1440158 | Ivan Mammarella                | FLUXNET2015 FI-Hyy Hyytiala                     | 2020.2.15           |
| FI-Sod    | 10.18140/FLX/1440160 | Mika Aurela                    | FLUXNET2015 FI-Sod Sodankyla                    | 2020.2.15           |
| FR-Fon    | 10.18140/FLX/1440161 | Daniel Berveiller              | FLUXNET2015 FR-Fon Fontainebleau-Barbeau        | 2020.2.15           |
| FR-Gri    | 10.18140/FLX/1440162 | Pauline Buysse                 | FLUXNET2015 FR-Gri Grignon                      | 2020.2.15           |
| FR-LBr    | 10.18140/FLX/1440163 | Paul Berbigier                 | FLUXNET2015 FR-LBr Le Bray                      | 2020.2.15           |
| FR-Pue    | 10.18140/FLX/1440164 | Jean-Marc Ourcival             | FLUXNET2015 FR-Pue Puechabon                    | 2020.2.15           |
| GF-Guy    | 10.18140/FLX/1440165 | Damien BONAL                   | FLUXNET2015 GF-Guy Guyaflux (French Guiana)     | 2020.2.15           |
| IT-Col    | 10.18140/FLX/1440167 | Giorgio Matteucci              | FLUXNET2015 IT-Col Collelongo                   | 2020.2.15           |
| IT-Cpz    | 10.18140/FLX/1440168 | Riccardo Valentini             | FLUXNET2015 IT-Cpz Castelporziano               | 2020.2.15           |
| IT-Lav    | 10.18140/FLX/1440169 | Damiano Gianelle               | FLUXNET2015 IT-Lav Lavarone                     | 2020.2.15           |
| IT-Noe    | 10.18140/FLX/1440171 | Donatella Spano                | FLUXNET2015 IT-Noe Arca di Noe - Le Prigionette | 2020.2.15           |
| IT-Ren    | 10.18140/FLX/1440173 | Leonardo Montagnani            | FLUXNET2015 IT-Ren Renon                        | 2020.2.15           |
| IT-Ro1    | 10.18140/FLX/1440174 | Riccardo Valentini             | FLUXNET2015 IT-Ro1 Roccarespampani 1            | 2020.2.15           |
| IT-Ro2    | 10.18140/FLX/1440175 | Dario Papale                   | FLUXNET2015 IT-Ro2 Roccarespampani 2            | 2020.2.15           |
| IT-SRo    | 10.18140/FLX/1440176 | Carsten Gruening               | FLUXNET2015 IT-SRo San Rossore                  | 2020.2.15           |
| IT-Tor    | 10.18140/FLX/1440237 | Edoardo Cremonese              | FLUXNET2015 IT-Tor Torgnon                      | 2020.2.15           |
| MY-PSO    | 10.18140/FLX/1440240 | Yoshiko Kosugi                 | FLUXNET2015 MY-PSO Pasoh Forest Reserve (PSO)   | 2020.2.15           |
| NL-Hor    | 10.18140/FLX/1440177 | Han Dolman                     | FLUXNET2015 NL-Hor Horstermeer                  | 2020.2.15           |
| NL-Loo    | 10.18140/FLX/1440178 | Eddy Moors                     | FLUXNET2015 NL-Loo Loobos                       | 2020.2.15           |
| RU-Cok    | 10.18140/FLX/1440182 | Han Dolman                     | FLUXNET2015 RU-Cok Chokurdakh                   | 2020.2.15           |
| RU-Fyo    | 10.18140/FLX/1440183 | Andrej Varlagin                | FLUXNET2015 RU-Fyo Fyodorovskoye                | 2020.2.15           |
| RU-Sam    | 10.18140/FLX/1440185 | Lars Kutzbach                  | FLUXNET2015 RU-Sam Samoylov                     | 2020.2.15           |



| Site name | DOI                  | Creator           | Title                                                                               | Date of last access |
|-----------|----------------------|-------------------|-------------------------------------------------------------------------------------|---------------------|
| US-Atq    | 10.18140/FLX/1440067 | Donatella Zona    | FLUXNET2015 US-Atq Atqasuk                                                          | 2020.2.15           |
| US-Blo    | 10.18140/FLX/1440068 | Allen Goldstein   | FLUXNET2015 US-Blo Blodgett Forest                                                  | 2020.2.15           |
| US-Cop    | 10.18140/FLX/1440100 | David Bowling     | FLUXNET2015 US-Cop Corral Pocket                                                    | 2020.2.15           |
| US-GBT    | 10.18140/FLX/1440118 | Bill Massman      | FLUXNET2015 US-GBT GLEES Brooklyn Tower                                             | 2020.2.15           |
| US-GLE    | 10.18140/FLX/1440069 | Bill Massman      | FLUXNET2015 US-GLE GLEES                                                            | 2020.2.15           |
| US-Goo    | 10.18140/FLX/1440070 | Tilden Meyers     | FLUXNET2015 US-Goo Goodwin Creek                                                    | 2020.2.15           |
| US-Ha1    | 10.18140/FLX/1440071 | J. William Munger | FLUXNET2015 US-Ha1 Harvard Forest EMS Tower<br>(HFR1)                               | 2020.2.15           |
| US-IB2    | 10.18140/FLX/1440072 | Roser Matamala    | FLUXNET2015 US-IB2 Fermi National Accelerator<br>Laboratory- Batavia (Prairie site) | 2020.2.15           |
| US-Los    | 10.18140/FLX/1440076 | Ankur Desai       | FLUXNET2015 US-Los Lost Creek                                                       | 2020.2.15           |
| US-Me2    | 10.18140/FLX/1440079 | Ankur Desai       | FLUXNET2015 US-Los Lost Creek                                                       | 2020.2.15           |
| US-Me3    | 10.18140/FLX/1440080 | Bev Law           | FLUXNET2015 US-Me3 Metolius-second young aged pine                                  | 2020.2.15           |
| US-MMS    | 10.18140/FLX/1440083 | Kim Novick        | FLUXNET2015 US-MMS Morgan Monroe State Forest                                       | 2020.2.15           |
| US-Ne1    | 10.18140/FLX/1440084 | Andy Suyker       | FLUXNET2015 US-Ne1 Mead - irrigated continuous maize<br>site                        | 2020.2.15           |
| US-Ne2    | 10.18140/FLX/1440085 | Andy Suyker       | FLUXNET2015 US-Ne2 Mead - irrigated maize-soybean<br>rotation site                  | 2020.2.15           |
| US-Ne3    | 10.18140/FLX/1440086 | Andy Suyker       | FLUXNET2015 US-Ne3 Mead - rainfed maize-soybean<br>rotation site                    | 2020.2.15           |
| US-NR1    | 10.18140/FLX/1440087 | Peter D. Blanken  | FLUXNET2015 US-NR1 Niwot Ridge Forest (LTER<br>NWT1)                                | 2020.2.15           |
| US-SRC    | 10.18140/FLX/1440098 | Shirley Kurc      | FLUXNET2015 US-SRC Santa Rita Creosote                                              | 2020.2.15           |
| US-SRG    | 10.18140/FLX/1440114 | Russell Scott     | FLUXNET2015 US-SRG Santa Rita Grassland                                             | 2020.2.15           |

| Site name | DOI                  | Creator           | Title                                                | Date of last access |
|-----------|----------------------|-------------------|------------------------------------------------------|---------------------|
| US-SRM    | 10.18140/FLX/1440090 | Russell Scott     | FLUXNET2015 US-SRM Santa Rita Mesquite               | 2020.2.15           |
| US-Syv    | 10.18140/FLX/1440091 | Ankur Desai       | FLUXNET2015 US-Syv Sylvania Wilderness Area          | 2020.2.15           |
| US-Ton    | 10.18140/FLX/1440092 | Siyan Ma          | FLUXNET2015 US-Ton Tonzi Ranch                       | 2020.2.15           |
| US-UMB    | 10.18140/FLX/1440093 | Christopher Gough | FLUXNET2015 US-UMB Univ. of Mich. Biological Station | 2020.2.15           |
| US-UMd    | 10.18140/FLX/1440101 | Christopher Gough | FLUXNET2015 US-UMd UMBS Disturbance                  | 2020.2.15           |
| US-Var    | 10.18140/FLX/1440094 | Siyan Ma          | FLUXNET2015 US-Var Vaira Ranch- Ione                 | 2020.2.15           |
| US-WCr    | 10.18140/FLX/1440095 | Ankur Desai       | FLUXNET2015 US-WCr Willow Creek                      | 2020.2.15           |
| US-Whs    | 10.18140/FLX/1440097 | Russ Scott        | FLUXNET2015 US-Whs Walnut Gulch Lucky Hills Shrub    | 2020.2.15           |
| US-Wkg    | 10.18140/FLX/1440096 | Russell Scott     | FLUXNET2015 US-Wkg Walnut Gulch Kendall Grasslands   | 2020.2.15           |
| ZA-Kru    | 10.18140/FLX/1440188 | Bob Scholes       | FLUXNET2015 ZA-Kru Skukuza                           | 2020.2.15           |
